# Supplementary material for: Effectiveness of Oral Nutritional Supplements on Older People with Anorexia: A Systematic Review and Meta-Analysis of Randomized Controlled Trials
Source: PubMed Central journal article supplement (PMC8001033; doi:10.3390/nu13030835), 2021-03-03
Supplement: nutrients-13-00835-s001.pdf [file nutrients-13-00835-s001.pdf]

## Supplementary Materials

Table S1. Database search formulas (example for 4 databases)

| PubMed | Search terms for query                                                                                                                                                                                                                                        | Results   |
|--------|---------------------------------------------------------------------------------------------------------------------------------------------------------------------------------------------------------------------------------------------------------------|-----------|
| #1     | “aging” (MeSH Terms) OR “aging” (All Fields) OR “ageing” (All Fields) OR “aged” (MeSH Terms) OR “aged” (All Fields) OR “older” (All Fields) OR “older people” (All Fields) OR “elderly” (MeSH Terms) OR “elderly” (All Fields) OR “older adults” (All Fields) | 5,916,110 |
| #2     | “appetite” (MeSH Terms) OR “appetite” (All Fields)                                                                                                                                                                                                            | 47,371    |
| #3     | “energy intake*” (All Fields) OR “food intake*” (All Fields) OR “food intake*” (All Fields)                                                                                                                                                                   | 301,025   |
| #4     | “oral nutritional supplement*” OR “oral nutritional intervention*” OR “oral supplement*” OR “enriched meal*” OR “nutritional intervention*” OR “ONS”                                                                                                          | 95,371    |
| #5     | “anorexia” OR “anorexia of ageing” OR “elderly with anorexia” OR “older people with anorexia” OR “senile anorexia”                                                                                                                                            | 7,283     |
| #6     | “Randomized Controlled Trial*” [Publication Type] AND (“Randomized Controlled Trial*”[Title/Abstract] OR “randomization” [Title/Abstract])                                                                                                                    | 152,454   |

|                                                                 |                                                                                                                                                                |           |
|-----------------------------------------------------------------|----------------------------------------------------------------------------------------------------------------------------------------------------------------|-----------|
| #7                                                              | #1 AND #2 AND #3 AND #4 AND #5 AND #6                                                                                                                          | 116       |
| <b>Embase</b>                                                   |                                                                                                                                                                |           |
| #1                                                              | 'anorexia of aging'/exp                                                                                                                                        | 1388      |
| #2                                                              | 'oral nutritional supplement*'/exp                                                                                                                             | 10,017    |
| #3                                                              | 'older people':ti,ab,it OR 'older people'/exp OR 'older adult*':ti,ab,it OR 'older adult*'/exp OR elderly/exp OR elderly:ti,ab,it OR aged/exp OR aged:ti,ab,it | 4,948,072 |
| #4                                                              | 'randomized controlled trial*':ti,ab,it OR 'randomization*':ti,ab,it OR 'randomized controlled trial*'/exp                                                     | 948,576   |
| #5                                                              | #1 AND #3                                                                                                                                                      | 1,060     |
| #6                                                              | #5 AND ([aged]/lim OR [very elderly]/lim)                                                                                                                      | 589       |
| #7                                                              | #6 AND #2 AND #4                                                                                                                                               | 101       |
| <b>The Cochrane library</b>                                     |                                                                                                                                                                |           |
| #1                                                              | MeSH descriptor: [anorexia of aging] explode all trees                                                                                                         | 81        |
| #2                                                              | MeSH descriptor: [oral nutritional supplement*] explode all trees                                                                                              | 2467      |
| #3                                                              | Cochrane trials                                                                                                                                                | 1,728,081 |
| #4                                                              | #1 AND #2 AND #3                                                                                                                                               | 6         |
| <b>China National Knowledge Infrastructure (CNKI) [Chinese]</b> |                                                                                                                                                                |           |
| #1                                                              | 'oral nutritional supplement*' (All Fields)                                                                                                                    | 19        |

---

|    |                                                                                                                                                      |      |
|----|------------------------------------------------------------------------------------------------------------------------------------------------------|------|
| #2 | aging” (All Fields) OR “ageing” (All Fields) OR “aged” (All Fields) OR “older” (All Fields) OR “older people” (All Fields) OR “elderly” (All Fields) | 1986 |
| #3 | “anorexia of ageing” OR “elderly with anorexia” OR “older people with anorexia”                                                                      | 28   |
| #4 | #1 AND #2 AND #3                                                                                                                                     | 0    |

---

Table S2. Measurement of food and energy intake

| Study (author, year) | Measurement methods                                                                                                                                                                                                                                                                                                                                                                                                                                                                                                                                                                                                                                                                                                                                                     |
|----------------------|-------------------------------------------------------------------------------------------------------------------------------------------------------------------------------------------------------------------------------------------------------------------------------------------------------------------------------------------------------------------------------------------------------------------------------------------------------------------------------------------------------------------------------------------------------------------------------------------------------------------------------------------------------------------------------------------------------------------------------------------------------------------------|
| Boudville, 2005      | The amount of food stuffs consumed during each meal was determined and energy and macronutrient intakes were calculated using the Nuttab nutrient database (SERVE 3.95, SERVE Nutrition Management System, St Ives, New South Wales, Australia).                                                                                                                                                                                                                                                                                                                                                                                                                                                                                                                        |
| Brocker, 1994        | Nutritional status was estimated on the basis of variables that were simple to measure in community practices.                                                                                                                                                                                                                                                                                                                                                                                                                                                                                                                                                                                                                                                          |
| Carlsson, 2005       | A dietary assessment was done by asking questions about the minimum daily intake of certain food items, chosen as important contributors of energy or other nutrients. The dietitian made an estimate of a normal day's food consumption. The nutritional value of the ONS was included in the calculation of the dietary intake at 6 months. Intakes were calculated by a standardized software program: Kost & Naringsdata AB, Dietist program, Stockholm, Sweden (The Swedish National Food Administration, 2000).                                                                                                                                                                                                                                                   |
| De jong, 1999        | Imated dietary record was obtained by three trained dietitians at baseline (wk 0) and in the last week of intervention (wk 17). During a home visit before the intervention period, dietitians provided subjects with a clear explanation of the way to record and estimate portion sizes in household measures. During a second visit, they checked the diary and weighed the portion sizes of the most frequently consumed foods in household measures. Food consumption data were coded (with frequent cross-checking by all three dietitians), and energy and nutrients were calculated with the computerized Dutch Food Composition Table of 1997 and a supplement (1995) for folate and vitamin B-12 (Stichting Nederlands Voedingsstoffenbestand 1995 and 1997). |

|                    |                                                                                                                                                                                                                                                                                                                                                                                                                                                                                                                                                        |
|--------------------|--------------------------------------------------------------------------------------------------------------------------------------------------------------------------------------------------------------------------------------------------------------------------------------------------------------------------------------------------------------------------------------------------------------------------------------------------------------------------------------------------------------------------------------------------------|
| De jong, 2000      | At baseline and in the last week of intervention, a 3 d (two weekdays and one weekend day; non-consecutive) estimated dietary record was collected by three trained dietitians. Food consumption data were coded (with a frequent cross-checking by all three dietitians) after which energy and nutrients were calculated with the computerized Dutch food composition tables (Stichting Nederlands Voedingsstoffenbestand, 1997). The energy and macronutrient content of the intervention food products were included in the food consumption data. |
| Faxen-Irving, 2001 | /                                                                                                                                                                                                                                                                                                                                                                                                                                                                                                                                                      |
| Faxen-Irving, 2011 | Total food and fluid intake was recorded at day 2-3 after admission, i.e., when the fat emulsion supplementation had started, and at day 8-9 or prior to discharge. The registration was performed by the staff by means of food records routinely used at the ward, i.e., the proportion of ingested food was estimated in quartiles in relation to the portion that was served. Fluid intake was estimated in ml.                                                                                                                                    |
| Gazzotti, 2003     | Consumption of each portion of supplement and regular meals were measured by direct observation and recorded as all, three quarters, half, one-quarter or none of the portion.                                                                                                                                                                                                                                                                                                                                                                         |
| Hubbard, 2008      | /                                                                                                                                                                                                                                                                                                                                                                                                                                                                                                                                                      |
| Irvine, 2004       | The weight of each food was recorded before and after meals using a Tefal kitchen scale (max 3 kg, precision 71 g). All items were weighed including snacks and drinks. Total energy intake was the sum of energy intakes for each meal plus snacks. Macronutrient and energy intakes were calculated from the weight of food consumed, the recipe used for cooking (available daily from the food production unit in hospital) and French food composition tables.                                                                                    |

|                  |                                                                                                                                                                                                                                                                                                                                                                                                                                                                                                                                                                                                      |
|------------------|------------------------------------------------------------------------------------------------------------------------------------------------------------------------------------------------------------------------------------------------------------------------------------------------------------------------------------------------------------------------------------------------------------------------------------------------------------------------------------------------------------------------------------------------------------------------------------------------------|
| Olin, 2008       | Two methods were used for registration of the food intake. The first was a 24-hour recall the residents were asked to recall the type and amount of all food and fluid consumed at each eating occasion the previous day and night. The 24-hour recall was used as a checklist for a one-day estimated dietary record, which was performed within a few days after the recall. The investigators registered the food and fluid intake at all eating occasions during one day. A telephone call was made to those residents who stayed up late in the evening to inquire about any additional intake. |
| Pouyssegur, 2015 | To compare the calorie supplement actually consumed from w0 to w6 between the two groups, dietary intakes were measured during 5 days (d0, d3, d6, d40 and d42). Food and beverage consumption was scored as the percentage of each serving actually consumed (score 0, 1/3, 2/3 and 1). In one nursing home, calorie count was done by the dietician in charge of the menus.                                                                                                                                                                                                                        |
| Ryan, 2004       | All food and drink items (excluding water) were covertly weighed before and after each meal using standard electronic kitchen scales (accurate to 71 g). The corresponding energy (kJ) and macronutrient intake (g) of the amounts consumed, with and without the additional intake from the supplements, was calculated over the whole day using the meal analysis program Bilnut 4.0 (Nutrisoft, France).                                                                                                                                                                                          |
| Smoliner, 2008   | The nursing home staff was trained for dietary assessment, and food intake was recorded in standard portions. Single components of meals in addition to snacks and drinks were recorded. A research assistant visited the wards weekly to control recording of food intake. Energy and nutrient analyses were performed with EbisPro 6.0, which is based on the German food code.                                                                                                                                                                                                                    |
| Stange, 2013     | Food intake was recorded once, for 3 consecutive days, including 1 weekend day and 2 week days, 6 to 8 weeks after study start in participants of 5 of the 6 nursing homes. Trained research staff weighed and documented the amount of all foods offered and                                                                                                                                                                                                                                                                                                                                        |

---

|                             |                                                                                                                                                                                                                                                                                                                                                                                                                                                                                                                                                                                                         |
|-----------------------------|---------------------------------------------------------------------------------------------------------------------------------------------------------------------------------------------------------------------------------------------------------------------------------------------------------------------------------------------------------------------------------------------------------------------------------------------------------------------------------------------------------------------------------------------------------------------------------------------------------|
|                             | leftovers after the residents' meals and in-between meals, including ONS consumed on these days. Energy and nutrient intake was calculated using a nutrient-analyzing software (EbisPro Version 6.0; J.Erhardt, Stuttgart, Germany) which is based on the German Food Code (BLS II, 3).                                                                                                                                                                                                                                                                                                                 |
| Tylner, 2016                | To assess energy and nutrient intake (protein, calcium, and vitamin D) a 3-day food and fluid record was performed. The staff at each residential home was trained in how to register food and fluid intake. Any prescription or intake of nutritional supplements was also registered.                                                                                                                                                                                                                                                                                                                 |
| Wouters-<br>Wesseling, 2002 | Before the intervention, food intake was assessed for three consecutive weekdays by a combination of weighed and unweighed dietary records by a trained dietician. The main meal was recorded by weighing the food if patients were served and by estimating portion sizes from standard measures if patients served themselves. Leftovers of meals were weighed or the proportion of the leftover in relation to standard measures was estimated. The intake from other meals during the day was a record in terms of current household measures and standard portion sizes reported by nursing staff. |

---

**Table S3.** Characteristics of the oral nutritional supplements (ONS) in the included studies

| Study (author, year) | Supply time                                            | ONS Content                                                                                                                                                                                                                                                                                                                                                         | Supply method                                                                                                                                                                                             | Executive personnel                                                                                             | Executive place                        |
|----------------------|--------------------------------------------------------|---------------------------------------------------------------------------------------------------------------------------------------------------------------------------------------------------------------------------------------------------------------------------------------------------------------------------------------------------------------------|-----------------------------------------------------------------------------------------------------------------------------------------------------------------------------------------------------------|-----------------------------------------------------------------------------------------------------------------|----------------------------------------|
| Boudville, 2005      | 30min/90min before lunch (standard, buffet-style meal) | <ul style="list-style-type: none"> <li>• a commercially available supplement drink</li> <li>• unrestricted access to a variety of foods (including tomato, ham, cheese, chicken, crackers, bread, butter, fruits, biscuits that were offered in separate portions and quantities (weighed before and after the meals to determine how much was consumed)</li> </ul> | <ul style="list-style-type: none"> <li>• a normal breakfast, then study subjects were required to drink a nutritional supplement drink before standard, buffet-style meal, drink within 10 min</li> </ul> | <ul style="list-style-type: none"> <li>• trained research dietitian</li> <li>• investigators (A. B.)</li> </ul> | social room in the rehabilitation ward |
| Brocker, 1994        | at the end of the mid-day meal                         | <ul style="list-style-type: none"> <li>• a commercially available production regular use in the hospital (Resource, Novartis Nutrition)</li> <li>• unrestricted access to a variety of foods including tomato, ham, cheese, chicken, crackers, bread, butter, fruits, biscuits that</li> </ul>                                                                      | <ul style="list-style-type: none"> <li>• presented in the form of two 5 g sachets to be dispersed in 200 ml of flavored solution, or with yoghurt, a milk-based dessert or stewed fruit</li> </ul>        | <ul style="list-style-type: none"> <li>• investigators (A. B.)</li> <li>• the research dietitian</li> </ul>     | own home                               |



|                |          |                                                                                                                                                                                                                                                                                              |                                                                                                                                                                                                   |                                                                             |
|----------------|----------|----------------------------------------------------------------------------------------------------------------------------------------------------------------------------------------------------------------------------------------------------------------------------------------------|---------------------------------------------------------------------------------------------------------------------------------------------------------------------------------------------------|-----------------------------------------------------------------------------|
|                |          | were offered in separate portions and quantities were weighed before and after the meals to determine how much was consumed                                                                                                                                                                  |                                                                                                                                                                                                   |                                                                             |
| Carlsson, 2005 | /        | <ul style="list-style-type: none"> <li>• protein rich oral liquid supplement</li> </ul>                                                                                                                                                                                                      | <ul style="list-style-type: none"> <li>• the patients were randomized to treatment with a protein-rich liquid supplement alone or in combination with nan drolone decanoate injections</li> </ul> | <ul style="list-style-type: none"> <li>• research nurses</li> </ul><br>ward |
| de Jong, 1999  | /        | <ul style="list-style-type: none"> <li>• fresh 100 g servings of fruit-based products (two types each of both fruit juice and compote) and 100 g servings of dairy products (vanilla custard, two types of fruit yogurt and 75 g of cheese curd with fruits) were provided weekly</li> </ul> | <ul style="list-style-type: none"> <li>• consume two products a day, one from a series of fruit products and one from a series of dairy products</li> </ul>                                       | <ul style="list-style-type: none"> <li>• trained dietitians</li> </ul><br>/ |
| de Jong, 2000  | any time | <ul style="list-style-type: none"> <li>• a fruit-based category and a dairy category</li> <li>• all subjects were asked to consume one product daily out of each category (one</li> </ul>                                                                                                    | <ul style="list-style-type: none"> <li>• all subjects were asked to consume one product daily out of each category (one dairy product and one fruit-based product per d)</li> </ul>               | <ul style="list-style-type: none"> <li>• researchers</li> </ul><br>homes    |

|                    |                                                                                      |                                                                                                                                                                                                                                                                       |                                                                                                                                                                                               |                                                                                                                         |                                  |
|--------------------|--------------------------------------------------------------------------------------|-----------------------------------------------------------------------------------------------------------------------------------------------------------------------------------------------------------------------------------------------------------------------|-----------------------------------------------------------------------------------------------------------------------------------------------------------------------------------------------|-------------------------------------------------------------------------------------------------------------------------|----------------------------------|
|                    |                                                                                      | dairy product and one fruit-based product per d)                                                                                                                                                                                                                      | <ul style="list-style-type: none"> <li>• Within the two categories several products were developed</li> </ul>                                                                                 |                                                                                                                         |                                  |
| Faxen-Irving, 2001 | when the prescribed drugs were distributed                                           | <ul style="list-style-type: none"> <li>• two 200 ml oral liquid supplements daily</li> <li>• a juicy supplement was given in-between meals in the afternoon and a balanced supplement was given in the evening when the prescribed drugs where distributed</li> </ul> | <ul style="list-style-type: none"> <li>• the care giver attended a 12-h educational programme about nutrition and diet for the elderly</li> </ul>                                             | <ul style="list-style-type: none"> <li>• dieticians</li> <li>• physicians</li> <li>• external care personnel</li> </ul> | community assisted housing units |
| Faxen-Irving, 2011 | at the same time as the pharmaceutical prescriptions, i.e., at 7.00, 14.00 and 20.00 | <ul style="list-style-type: none"> <li>• a dose of 30 ml fat emulsion (Calogen, strawberry flavored)</li> </ul>                                                                                                                                                       | <ul style="list-style-type: none"> <li>• fat emulsion was distributed at the same time as the pharmaceutical prescriptions and the intake of the fat emulsion was registered daily</li> </ul> | <ul style="list-style-type: none"> <li>• study nurses</li> </ul>                                                        | ward                             |

|                |                           |                                                                                                                                                                              |                                                                                                                                                                                                                                                                                         |                                                            |      |
|----------------|---------------------------|------------------------------------------------------------------------------------------------------------------------------------------------------------------------------|-----------------------------------------------------------------------------------------------------------------------------------------------------------------------------------------------------------------------------------------------------------------------------------------|------------------------------------------------------------|------|
| Gazzotti, 2003 | /                         | <ul style="list-style-type: none"> <li>• one Clinutren soup (1 kcal/ml) and one Clinutren 1.5 (1.5 kcal/ml) (Nestle' Clinical Nutrition, Brussels, Belgium)</li> </ul>       | <ul style="list-style-type: none"> <li>• prescription of ONS throughout hospitalization and convalescence.</li> <li>• nurses and patients (once at home) kept a daily record throughout the trial of the supplements taken and of spontaneous intakes</li> </ul>                        | <ul style="list-style-type: none"> <li>• nurses</li> </ul> | ward |
| Hubbard, 2008  | /                         | <ul style="list-style-type: none"> <li>• energy-dense supplement (Calogen, Nutricia)</li> <li>• dietary advice in the form of a standardized dietary advice sheet</li> </ul> | /                                                                                                                                                                                                                                                                                       | /                                                          | /    |
| Irvine, 2004   | follow standard breakfast | <ul style="list-style-type: none"> <li>• each studied under 3 conditions, in which they were given in random order at breakfast, and on consecutive days</li> </ul>          | <ul style="list-style-type: none"> <li>• on the 3 separate days, subjects consumed an identical breakfast at 08:00, contributing 200 kcal (10 g fat, 1 g protein and 25 g carbohydrates). Lunch (12:30) and dinner (18:30) consisted of a starter, main meal with vegetables</li> </ul> | /                                                          | ward |

|                  |                                              |                                                                                                                                                                                                                                                                            |                                                                                                                                        |                                  |                            |
|------------------|----------------------------------------------|----------------------------------------------------------------------------------------------------------------------------------------------------------------------------------------------------------------------------------------------------------------------------|----------------------------------------------------------------------------------------------------------------------------------------|----------------------------------|----------------------------|
|                  |                                              |                                                                                                                                                                                                                                                                            | and meat, a dairy product and dessert                                                                                                  |                                  |                            |
|                  |                                              |                                                                                                                                                                                                                                                                            | • snacks were offered at 15:00, and thereafter on request                                                                              |                                  |                            |
| Olin, 2008       | at evening                                   | • ONS were served in addition to their regular meals                                                                                                                                                                                                                       | • the residents were informed that they should eat their meals as usual and that the offered meal in the evening was an extra meal     | • care givers                    | service complex restaurant |
| Pouyssegur, 2015 | during the breakfast and/or during the snack | • received eight cookies daily, ingredients were wheat, flour, fresh butter, milk protein (casein), sugar, vanilla aroma, baking powder and salt<br>• no palm oil or other vegetable oil<br>• patients who were prescribed dairy dietary supplements continue to take them | • eat during or between meals or snacks                                                                                                | • participant<br>• nursing staff | nursing homes              |
| Ryan, 2004       | immediately following a standard hospital    | • oral sip supplements, matched for energy density and taste<br>• snacks were available on request                                                                                                                                                                         | • each patient was studied over a 3 consecutive day run consisting of 2 treatment (supplement given immediately after breakfast) and 1 |                                  | ward                       |

|                |                                 |                                                                                                                                                                                                                                                                                                        |                                                                                                                                                                                                                                                                             |                                                                             |
|----------------|---------------------------------|--------------------------------------------------------------------------------------------------------------------------------------------------------------------------------------------------------------------------------------------------------------------------------------------------------|-----------------------------------------------------------------------------------------------------------------------------------------------------------------------------------------------------------------------------------------------------------------------------|-----------------------------------------------------------------------------|
|                | breakfast (or lunch and dinner) |                                                                                                                                                                                                                                                                                                        | control (no supplement given) day, with treatment order being randomized across subjects using a Latin square design                                                                                                                                                        |                                                                             |
| Smoliner, 2008 | between meals                   | <ul style="list-style-type: none"> <li>• diet with protein- and energy-enriched soups and sauces and two additional snacks high in protein and energy</li> </ul>                                                                                                                                       | <ul style="list-style-type: none"> <li>• the residents were assigned to a group receiving the standard food of the nursing home or a group with a protein- and energy-enriched diet and snacks.</li> </ul>                                                                  | <ul style="list-style-type: none"> <li>• nursing home staff</li> </ul> ward |
| Stange, 2013   | between meals                   | <ul style="list-style-type: none"> <li>• 2 bottles of ONS with low volume (125 ml per bottle) and high nutrient and energy density (Fortimel Compact, Nutricia GmbH, Erlangen, Germany</li> <li>• 2.4 kcal/ml, 12 g protein and 300 kcal per bottle/per day, supplementary to regular meals</li> </ul> | <ul style="list-style-type: none"> <li>• care personnel were instructed to encourage residents to consume the amount offered, and to support compliance by varying flavors, providing smaller portion sizes more frequently, or by adapting the time of offering</li> </ul> | <ul style="list-style-type: none"> <li>• care givers</li> </ul> ward        |

|                         |                                                                                      |                                                                                                                                                                                                                                        |                                                                                                                                                                                                                                                                                                                                                        |                                                                                             |
|-------------------------|--------------------------------------------------------------------------------------|----------------------------------------------------------------------------------------------------------------------------------------------------------------------------------------------------------------------------------------|--------------------------------------------------------------------------------------------------------------------------------------------------------------------------------------------------------------------------------------------------------------------------------------------------------------------------------------------------------|---------------------------------------------------------------------------------------------|
| Tylner, 2016            | <p>at the same time as the medication, i.e., at 8:00 am, 12:00 noon, and 8:00 pm</p> | <ul style="list-style-type: none"> <li>• strawberry-flavored fat emulsion, Calogen Extra (Nutricia Advanced Medical Nutrition, Schiphol, The Netherlands)</li> </ul>                                                                   | <ul style="list-style-type: none"> <li>• routine nutritional care while being served energy- and protein-fortified food prepared in each of the care residential homes</li> </ul>                                                                                                                                                                      | <ul style="list-style-type: none"> <li>• the staff at each residential room home</li> </ul> |
| Wouters-Wesseling, 2002 | <p>during daytime between main meals</p>                                             | <ul style="list-style-type: none"> <li>• two different flavours (orange/peach and blackberry) supplements by Numico Research BV</li> <li>• the composition includes energy, protein, carbohydrates, fat, vitamins and so on</li> </ul> | <ul style="list-style-type: none"> <li>• patients received per day two tetrapacks of either the liquid nutrition supplement or a placebo product in a blinded manner in addition to their regular dietary intake for a study period of 3 months</li> <li>• patients were helped and encouraged by the nursing staff to drink the supplement</li> </ul> | <ul style="list-style-type: none"> <li>• nursing staff nursing homes</li> </ul>             |

HP=High protein; LP=Low protein; ONS=oral nutritional supplements.

Table S4. Characteristics of the measurement of subjective appetite in the included studies

| Study<br>(author, year) | Tools | Points         | Assess method                                                                             | Assess time                                                                                                                       | Assess content                                                                                                                                                    | Additional content                                                   |
|-------------------------|-------|----------------|-------------------------------------------------------------------------------------------|-----------------------------------------------------------------------------------------------------------------------------------|-------------------------------------------------------------------------------------------------------------------------------------------------------------------|----------------------------------------------------------------------|
| Boudville,<br>2005      | LS    | five-<br>point | The subjects<br>completed.                                                                | On four occasions<br>immediately before and 10<br>min after the pre-meal<br>drinks and immediately<br>before and after the meals. | to assess hunger, thirst, fullness,<br>prospective consumption (“how<br>much they could eat”) and<br>nausea.                                                      | /                                                                    |
| Brocker,<br>1994        | VAS   | 0-100          | /                                                                                         | /                                                                                                                                 | validated 100-point VAS<br>(Comparisons between scores<br>given by the various practitioners /<br>could not be made because each<br>treated only 10 patients).    |                                                                      |
| Carlsson,<br>2005       | VAS   | 0-3            | An experienced<br>hospital dietitian (PC)<br>made a<br>20–30 min long<br>interview of the | on the second post-<br>operative day and 6<br>months later at the<br>outpatient department.                                       | The patients rated their appetite:<br>0=good appetite, 1=neither good<br>nor poor appetite, 2=poor<br>appetite but eating, 3=poor<br>appetite and not eating. The | Executive personal:<br>an experienced<br>hospital dietitian<br>(PC). |

---

patients about their appetite and food habits (the week before the fracture) on the second post-operative day and 6 months later at the outpatient department.

---

patients described if their meals were self-made and, by using familiar household measures, the size and composition of their meals.

de Jong, 2000      LS      /      /      /

After reading the question, subjects had to score on a point LS with verbally labelled answering categories. An example of a question is the following statement: In former days my appetite was: 1. much better than nowadays, 2. better than nowadays, 3. the same as nowadays, 4. worse than

A higher score corresponded to a more positive feeling about their taste and smell perception, a better appetite and more feelings of hunger. Initially variables were calculated: present taste perception

---



|                        |     |      |                                                           |                                                                      |                                                                                                                                                                                                                             |                                                                                                                                                                                                                                                |
|------------------------|-----|------|-----------------------------------------------------------|----------------------------------------------------------------------|-----------------------------------------------------------------------------------------------------------------------------------------------------------------------------------------------------------------------------|------------------------------------------------------------------------------------------------------------------------------------------------------------------------------------------------------------------------------------------------|
|                        |     |      |                                                           |                                                                      | nowadays, 5. much worse than nowadays.                                                                                                                                                                                      | (eight items, range 8±40), present smell perception (three items, range 3±15), appetite (six items, range 6±30), daily feelings of hunger (nine items, range 9±45), present smell perception compared with the past (three items, range 3±15). |
| Faxen-<br>Irving, 2011 | VAS | 0-10 | Performed with the support of the study nurses (3 nurses) | Before lunch at first day of inclusion and at day 8 after inclusion. | Five questions were given, considered to evaluate various aspects of appetite, i.e., hunger and desire to eat. The questions were: 1. How hungry do you feel? 2. How full do you feel? 3. How strong is your desire to eat? | The patients in the intervention group were asked to rate the acceptance of the product on a scale ranging from 0 to 7, higher values                                                                                                          |

|                     |            |                   |                                                                                                                                                                                                                          |                                                                                                                                                                                                                                                                                                                                                                                                                                                         |                                                                                                                                                                                                                                                                                              |
|---------------------|------------|-------------------|--------------------------------------------------------------------------------------------------------------------------------------------------------------------------------------------------------------------------|---------------------------------------------------------------------------------------------------------------------------------------------------------------------------------------------------------------------------------------------------------------------------------------------------------------------------------------------------------------------------------------------------------------------------------------------------------|----------------------------------------------------------------------------------------------------------------------------------------------------------------------------------------------------------------------------------------------------------------------------------------------|
|                     |            |                   |                                                                                                                                                                                                                          | <p>4. How much do you think you could eat now? 5. How preoccupied are you with thoughts of food?</p>                                                                                                                                                                                                                                                                                                                                                    | <p>indicating better acceptance.</p>                                                                                                                                                                                                                                                         |
| <p>Irvine, 2004</p> | <p>VAS</p> | <p>/</p> <p>/</p> | <p>VAS was completed every half hour from before breakfast until lunch and hourly thereafter until diner. A total of 10.5 h was monitored. One investigator (PI) measured the lines with a ruler, to the nearest mm.</p> | <p>Questionnaires consisted of an A4 sheet of paper with seven 100 mm lines corresponding to seven questions considering hunger, fullness, desire to eat, pre-occupation with food, thirst, stress and cold. Weighted at the end of each line were two extreme states in relation to the question asked. The two answers anchoring each end were “not at all” and “extremely”. Patients were instructed to mark a point on the line between the two</p> | <p>Desire to eat, a psychological rather than a physical sensation, referred to their earning for some food, differing from “preoccupation with food” which was termed as an inability to think of anything else but food. Fullness (used proxy measure of satiety) was evaluated by the</p> |

|                  |     |      |                                                   |                                                                                                       |                                                            |                                                                                                       |
|------------------|-----|------|---------------------------------------------------|-------------------------------------------------------------------------------------------------------|------------------------------------------------------------|-------------------------------------------------------------------------------------------------------|
|                  |     |      |                                                   |                                                                                                       | extremities that best described their sensation.           | question “How full do you feel” and described as the pleasant state of contentment felt after eating. |
| Pouyssegur, 2015 | NS  | 0-10 | Rated by the participant or by the nursing staff. | from w0 to w6                                                                                         | 0 (absolutely no appetite) to 10 (extremely good appetite) |                                                                                                       |
| Tylner, 2016     | VAS | 0-10 | Were asked to rate their appetite.                | All assessments and blood samples were performed and collected at start and end of each study period. | /                                                          | /                                                                                                     |

VAS: Visual rating scale; LS: Likert Scales; NS: Numerical Scale.

Table S5. Converted values included in the meta-analysis of appetite

| Study (author,<br>year) | ONS    |       |    | Control |       |    | Time      | Points |
|-------------------------|--------|-------|----|---------|-------|----|-----------|--------|
|                         | mean   | SD    | n  | mean    | SD    | n  |           |        |
| Brocker, 1994           | 0.44   | 0.18  | 92 | 0.38    | 0.21  | 93 | 30d       | 0-100  |
| Brocker, 1994           | 0.62   | 0.19  | 92 | 0.47    | 0.23  | 93 | 60d       |        |
| de Jong, 2000           | -0.167 | 0.133 | 40 | 0       | 0.2   | 36 | /         | 0-10   |
| Faxen-Irving,<br>2011   | 0.64   | 2.8   | 24 | -0.56   | 2.9   | 27 | /         | 0-10   |
| Pouyssegur,<br>2015     | 0.443  | 0.719 | 61 | 0.151   | 0.601 | 51 | w0 to w6  | 0-10   |
| Pouyssegur,<br>2015     | 0.611  | 0.763 | 54 | 0.2     | 0.639 | 50 | w0 to w10 | 0-10   |
| Pouyssegur,<br>2015     | 0.784  | 0.832 | 51 | 0.191   | 0.741 | 47 | w0 to w18 | 0-10   |
